# Supplementary material
Source: publisher figshare collection journal article supplement (https://rs.figshare.com/ndownloader/files/13512098)

Figure S2. Observed versus predicted conductivity values for training (a) and testing (b) sets in the spatial Random Forest model.

(a)


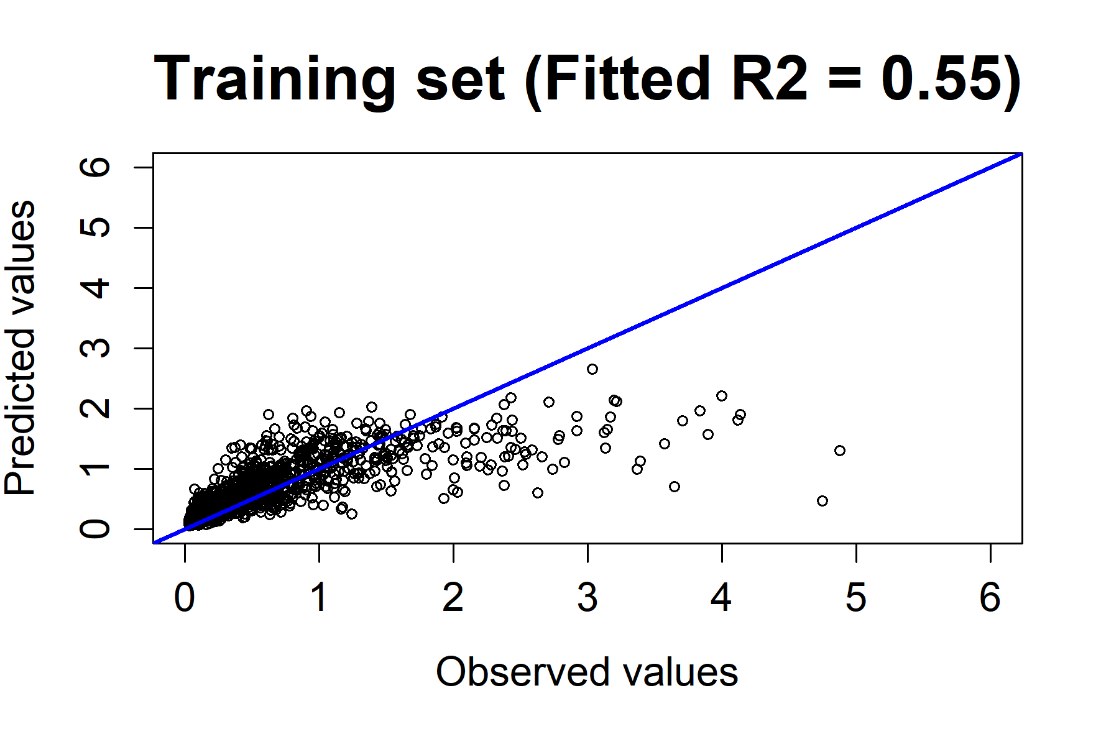


(b)


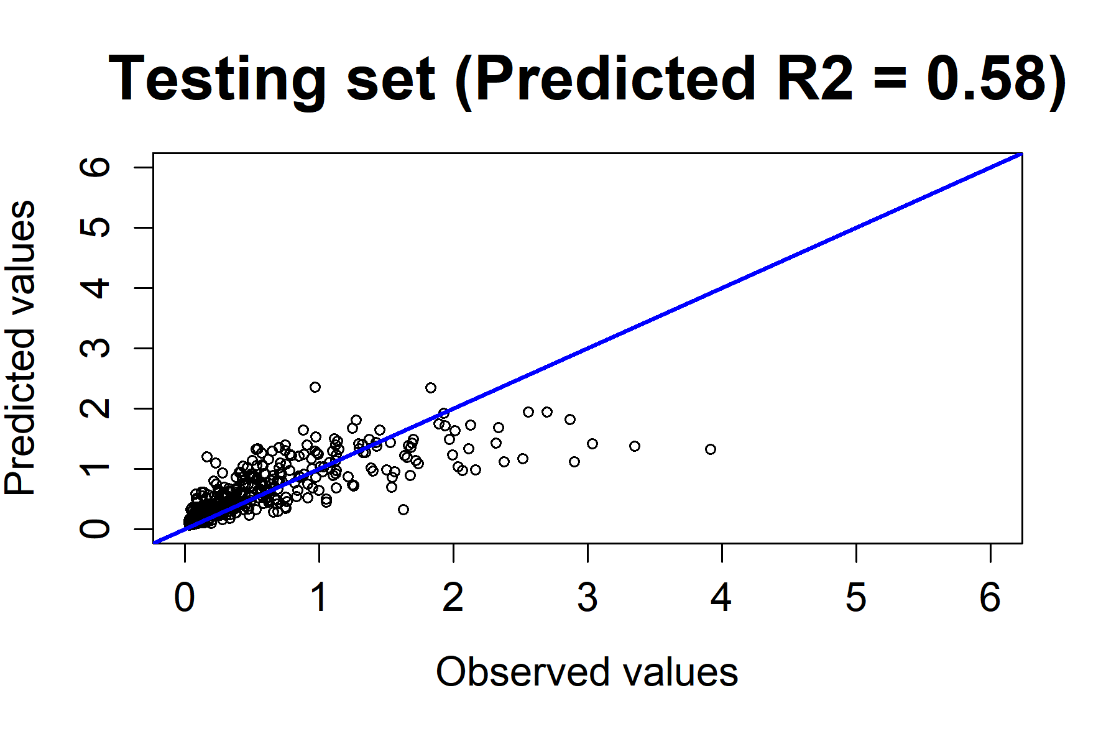

Supplement: Supplementary file 1 [file 13512098]
